# Supplementary material for: Targeted Deletion of PTEN in Kisspeptin Cells Results in Brain Region- and Sex-Specific Effects on Kisspeptin Expression and Gonadotropin Release
Source: MDPI journal article supplement (doi:10.3390/ijms21062107), 2020-03-19
Supplement: s1 [file s1]

**Table 1. Primary antibody table**

| <b>Peptide/protein target</b>                                     | <b>Antigen sequence</b>                                         | <b>Name of antibody</b>              | <b>Manufacturer, catalog No.</b>                                            | <b>Species raised in; monoclonal or polyclonal</b> | <b>Dilution used</b> | <b>References</b> |
|-------------------------------------------------------------------|-----------------------------------------------------------------|--------------------------------------|-----------------------------------------------------------------------------|----------------------------------------------------|----------------------|-------------------|
| phosphatase and tensin homologue deleted on chromosome ten (PTEN) | Carboxy-terminal sequence of human PTEN.                        | PTEN (26H9)                          | Cell Signaling, 9556S                                                       | Mouse; monoclonal                                  | 1:100                | [42, 57, 58]      |
| green fluorescent protein (GFP)                                   | Purified recombinant GFP emulsified in Freund's adjuvant        | Anti-GFP (green fluorescent protein) | AVES, GFP-1010                                                              | Chicken; polyclonal                                | 1: 1000              |                   |
| kisspeptin                                                        | N terminus of the full-length mouse KISS1 protein               | Anti-kisspeptin                      | Abcam, ab19028                                                              | Rabbit; polyclonal                                 | 2 ug/mL              | [63, 64]          |
| kisspeptin                                                        | Ten amino acid C-terminal of murine kisspeptin (residues 43–52) | Anti-kisspeptin Batch #566           | Alain Caraty, Institute National de la Recherche Agronomique, Paris, France | Rabbit; polyclonal                                 | 1:10,000             | [55, 56]          |
| $\beta$ -actin                                                    | Amino-terminus of human $\beta$ -actin                          | $\beta$ -actin                       | Cell Signaling; 13E5                                                        | Rabbit; monoclonal                                 | 1:1000               |                   |
| P70 S6 kinase                                                     | Residues surrounding (Ser235 and Ser236)                        | Phospho-S6 Ribosomal protein         | Cell signaling, 2211S                                                       | Rabbit; polyclonal                                 | 1: 200               | [59, 60]          |
