# Supplementary material for: Targeted Deletion of PTEN in Kisspeptin Cells Results in Brain Region- and Sex-Specific Effects on Kisspeptin Expression and Gonadotropin Release
Source: MDPI journal article supplement (doi:10.3390/ijms21062107), 2020-03-19
Supplement: s1 [file s1]

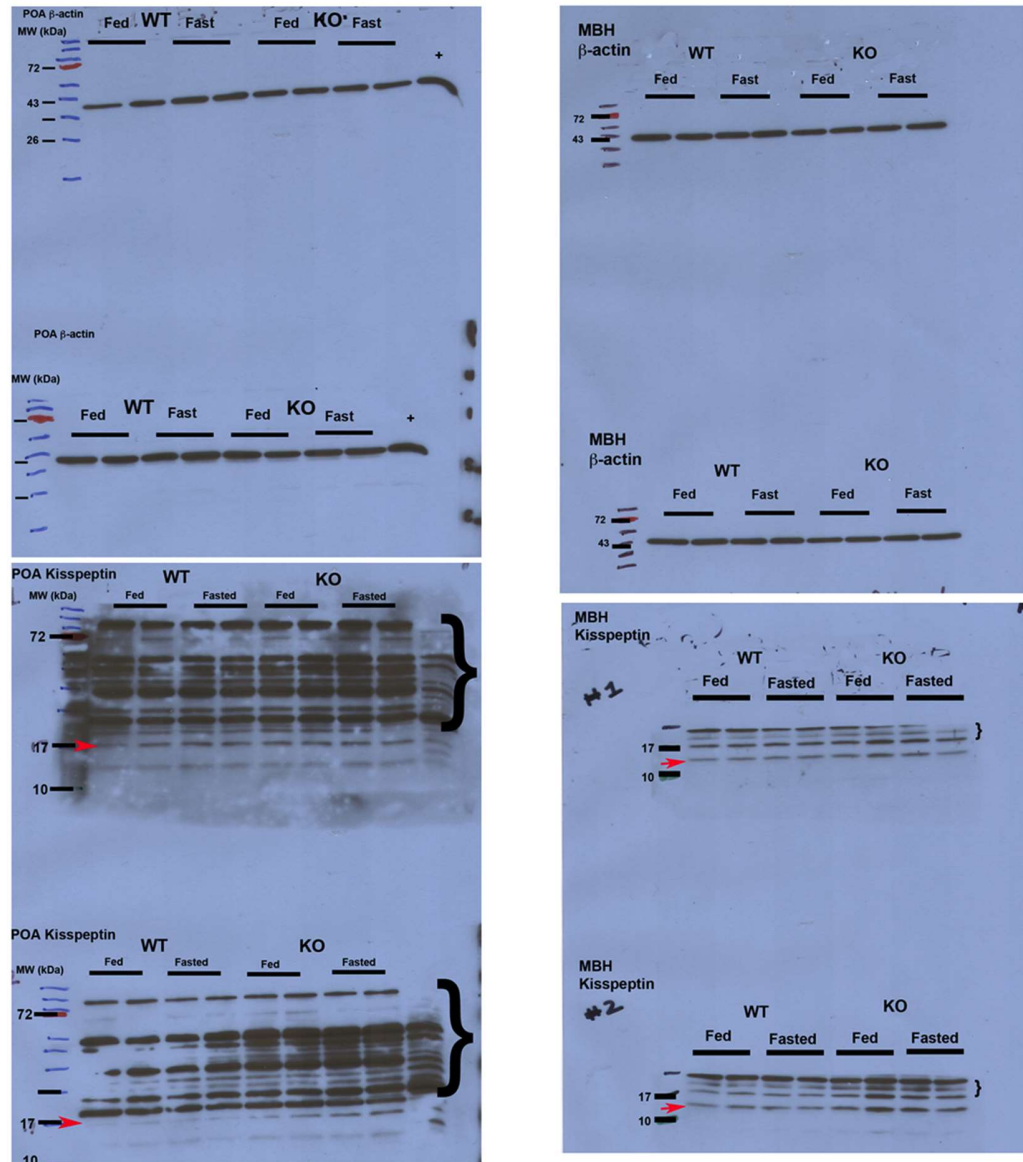

**Supp. Fig. 2.** Immunoblots showing detection of  $\beta$ -actin and kisspeptin protein (red arrow points to expected band at 15 kDa) in the POA and MBH of WT and Kiss-PTEN KO mice that were fed or fasted for 48 hours. Non-specific bands are enclosed in brackets. MW, molecular weight markers.
