# Supplementary material for: Targeted Deletion of PTEN in Kisspeptin Cells Results in Brain Region- and Sex-Specific Effects on Kisspeptin Expression and Gonadotropin Release
Source: MDPI journal article supplement (doi:10.3390/ijms21062107), 2020-03-19
Supplement: s1 [file s1]

**A.**

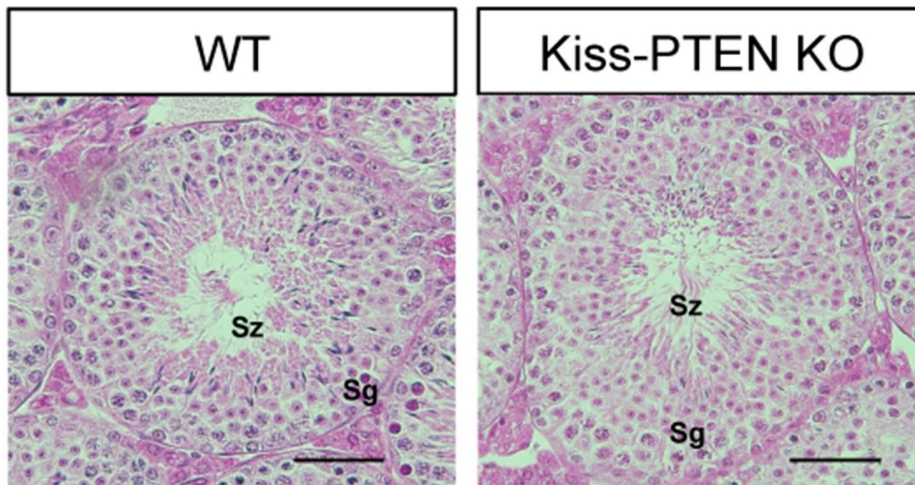

**B.**

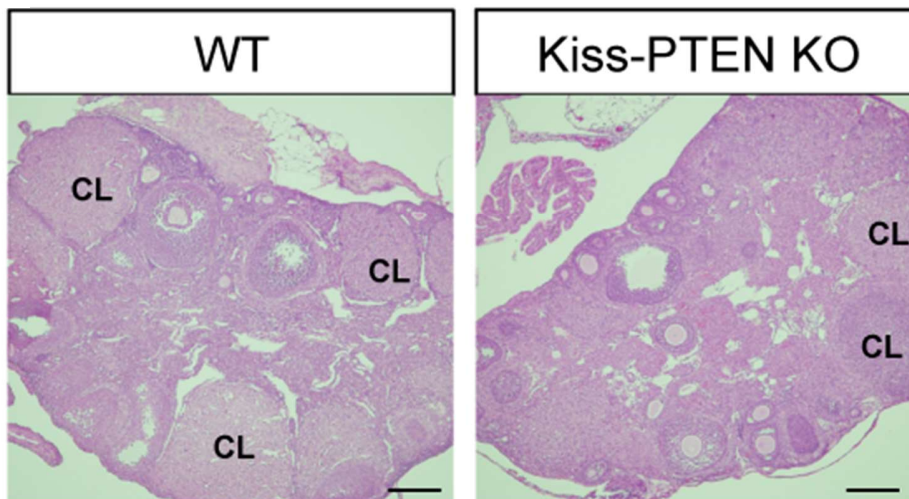

Supp. Fig. 1. (A) Representative photomicrographs of adult WT and Kiss-PTEN KO testicular tissue (cross-section) showing normal seminiferous tubules and spermatogenic cells (Sg, spermatogonia; Sz, spermatozoa). (B) Representative photomicrographs of adult WT and Kiss-PTEN KO ovaries (CL, corpus luteum). Scale bars: (A) = 50  $\mu$ m; (B) = 200  $\mu$ m.
