# Supplementary material for: Targeted Deletion of PTEN in Kisspeptin Cells Results in Brain Region- and Sex-Specific Effects on Kisspeptin Expression and Gonadotropin Release
Source: MDPI journal article supplement (doi:10.3390/ijms21062107), 2020-03-19
Supplement: s1 [file s1]

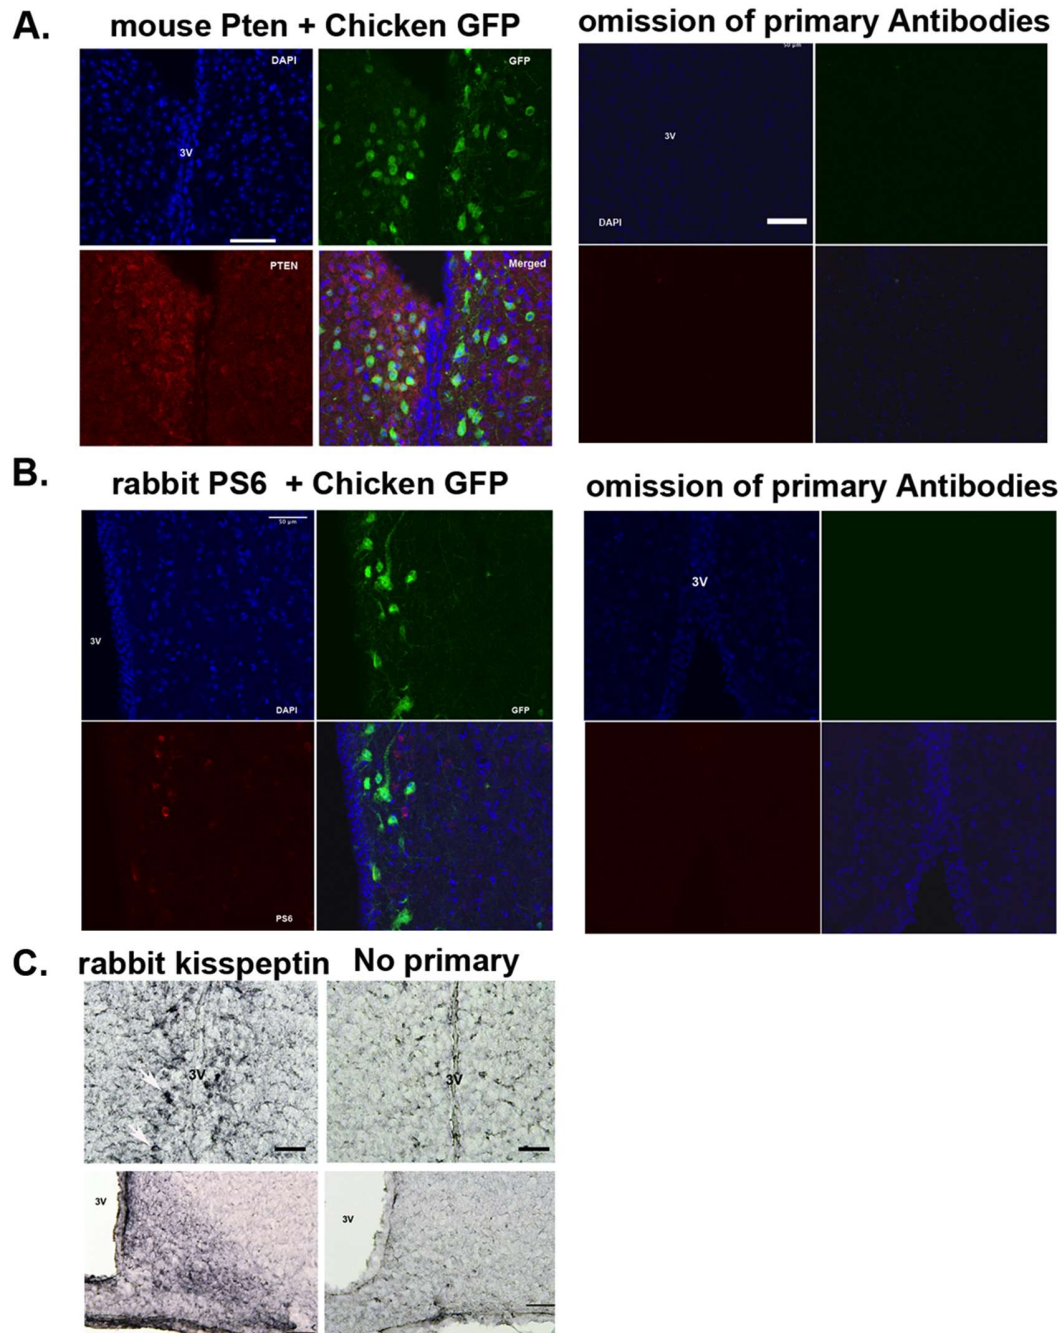

Supp. Fig. 3. (A) Representative immunofluorescent images of Kiss-GFP+ neurons (green), and Pten (red) in the AVPV with right panels showing representative images omitting the primary antibodies. (B) Representative immunofluorescent images of Kiss-GFP+ neurons (green), and pS6 (red), in the AVPV with right panels showing representative images omitting the primary antibodies. (C) Representative images of AVPV and ARC kisspeptin-ir with right panels showing representative images omitting the primary antibody.
