# Supplementary material for: Targeted Deletion of PTEN in Kisspeptin Cells Results in Brain Region- and Sex-Specific Effects on Kisspeptin Expression and Gonadotropin Release
Source: Int J Mol Sci. 2020 Mar 19;21(6):2107. doi: 10.3390/ijms21062107 (PMC7139936; doi:10.3390/ijms21062107)
Supplement: Supplementary file 1 [file ijms-21-02107-s001.zip]

Archive with 5 entries (4 files):
- ijms-720494 supplementary done/
- ijms-720494 supplementary done/Supp Figure 1.pdf
- ijms-720494 supplementary done/Supp. Fig. 2 western.pdf
- ijms-720494 supplementary done/Supp. Figure  3.pdf
- ijms-720494 supplementary done/Supp. Table 1.pdf
